# Supplementary material for: Report on ICDP Deep Dust workshops: probing continental climate of the late Paleozoic icehouse–greenhouse transition and beyond
Source: Copernicus journal article supplement (doi:10.5194/sd-28-93-2020), 2020-12-01
Supplement: Supplementary file 1 [file sd-28-93-2020-supplement.pdf]

Supplement of Sci. Dril., 28, 93–112, 2020  
<https://doi.org/10.5194/sd-28-93-2020-supplement>  
© Author(s) 2020. This work is distributed under  
the Creative Commons Attribution 4.0 License.

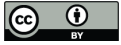

*Supplement of*

**Report on ICDP Deep Dust workshops: probing continental climate of  
the late Paleozoic icehouse–greenhouse transition and beyond**

**Gerilyn S. Soreghan et al.**

*Correspondence to:* Gerilyn S. Soreghan (lsoreg@ou.edu)

The copyright of individual parts of the supplement might differ from the CC BY 4.0 License.

## Major Topics to Investigate

- 1- Equatorial paleoclimate of peak icehouse and icehouse collapse
- 2- Atmospheric dust and the Pangaeian megamonsoon
- 3- The later Permian— Extremes leading up to the Great Dying
- 4- The character and extent of the modern and fossil deep microbial biosphere
- 5- Auxiliary Science— Red-bed sedimentology, Pangaea paleogeography, induced seismicity, tectonics, geothermal energy, hydrogeology, drilling engineering

| Questions                                                                                                                                                                                                                                                                                                                                                                                  | Major topic/s | Methods/Approaches                                                                                                                                                                                                            |
|--------------------------------------------------------------------------------------------------------------------------------------------------------------------------------------------------------------------------------------------------------------------------------------------------------------------------------------------------------------------------------------------|---------------|-------------------------------------------------------------------------------------------------------------------------------------------------------------------------------------------------------------------------------|
| Did glaciation affect low latitudes? If so, what were the altitudinal limits of glaciation?                                                                                                                                                                                                                                                                                                | 1             | Coring of uplands to assess presence of ice-contact or periglacial indicators; correlation to paleoshorelines.                                                                                                                |
| LPIA deglaciation: What is the far-field record (rate, effects), and what were the drivers? If CO <sub>2</sub> was a primary driver, what caused its extreme drawdown and subsequent rise on the scale of the entire Permian? What sources/sinks and mechanisms can explain the magnitude and frequency of glacial-interglacial CO <sub>2</sub> variations? Can we assess O <sub>2</sub> ? | 1, 3          | Assemble pCO <sub>2</sub> indicators (e.g. from paleosols; fluid inclusions?); carbon-cycle modeling incorporating dust-fertilization effects, weathering effects (on both long- and short timescales).                       |
| What role did mineral aerosols play in low-latitude climate? Can we quantify dust loading of the equatorial atmosphere, and the effects? How does dust provenance inform atmospheric circulation (w/ impact on understanding the megamonsoon)?                                                                                                                                             | 1, 2, 3       | Reconstruction of dust loading (mass accumulation rates) by dating, quantitative cyclostratigraphy; dust provenance (detrital zircons, geochemistry; anisotropy of magnetic susceptibility); Fe geochemistry of dust deposits |
| What were spatiotemporal patterns of continental climate change— eg the character and pace of proposed eastwardly progressing aridification?                                                                                                                                                                                                                                               | 1, 2, 3       | Indices of chemical weathering from loess, paleosols; compilation of arid-climate indicators; measurement of Sr isotopes; E-W correction.                                                                                     |
| Can we assess astronomical forcing of tropical climate and hydroclimate from the icehouse-greenhouse transition up toward the Great Dying? Are there changes in dominant periodicities, especially across the major deglaciation?                                                                                                                                                          | 1, 2, 3       | Conduct quantitative cyclostratigraphy throughout the cored successions.                                                                                                                                                      |

| Questions                                                                                                                                                                                                             | Major topic/s | Methods/Approaches                                                                                                                                                                                                |
|-----------------------------------------------------------------------------------------------------------------------------------------------------------------------------------------------------------------------|---------------|-------------------------------------------------------------------------------------------------------------------------------------------------------------------------------------------------------------------|
| How does Fe reactivity in dust deposits vary through time and (low latitude) space (E-W equatorial)?                                                                                                                  | 1, 2, 3       | Measure Fe reactivity through the cored intervals.                                                                                                                                                                |
| How extreme— in terms of hydroclimate, temperature, and pH (acidity) did equatorial environments become? What were the critical forcing factors (e.g. CO <sub>2</sub> , aerosols, continental position, monsoon)?     | 2 and 3       | Assemble paleoclimate indicators, especially extent of arid-climate proxies, evaporite inclusions, organic geochemistry, etc., and proxies for atmospheric circulation (eg loess provenance).                     |
| What drove the end-Guadalupian biotic event? Is it related to climatic events? Was it spatially diachronous?                                                                                                          | 3             | Assemble proxies and indicators for temperature/aridity etc— e.g. fluid inclusions, clumped isotopes (of eg pedogenic carbonate), weathering indices, organic biomarkers, etc. Correlate using e.g. palynofacies. |
| What is the extent of the (modern) microbial biosphere? How deep? What are the metabolic pathways for this life? Are As and Fe involved? Hydrocarbons?                                                                | 4             | Conduct clean sampling of pore fluids during coring.                                                                                                                                                              |
| Can we document a fossil microbial biosphere? What types of extremophiles might have existed? Under what pH/temp conditions?                                                                                          | 4             | Examine fluid inclusions in, e.g. evaporites. Document life forms, and accompanying pH and temperature proxies.                                                                                                   |
| What is the origin of red beds, especially those formed far from localized volcanism? Did the Permian atmosphere promote iron reactivity? And/or O <sub>2</sub> levels (potentially obtainable via fluid inclusions?) | 5             | See above— measure Fe reactivity on loess and dust-associated deposits.                                                                                                                                           |
| Can we constrain uplift rates of the Appalachian and Variscan orogens using thermochronology?                                                                                                                         | 5             | Conduct thermochronology through cored intervals.                                                                                                                                                                 |
| What are baseline values of modern states such as geothermal gradients and micro seismicity in the target basins?                                                                                                     | 5             | Instrument the boreholes for monitoring.                                                                                                                                                                          |
| What is magnetic behavior during a superchron? Did orbital forcing affect magnetic field behavior?                                                                                                                    | 5             | Cyclostratigraphy                                                                                                                                                                                                 |
| What was the paleogeography of Pangea during the Permian? Is it better captured by Pangea A or Pangea B (or neither)? What were the latitudes of the study sites, and their continentality?                           | 5             | Paleomagnetism through the cores.                                                                                                                                                                                 |
